# Supplementary material
Source: publisher figshare collection journal article supplement (https://sage.figshare.com/ndownloader/files/15254237)
Supplement: Supplementary file 1 [file 15254237]

| **Dear participant,**  **We request to answer a questionnaire related to educative function of social media.** | | | | | | | | | | | | | | | | | | | | | | | | | | | | | | | | | | | | | |
| --- | --- | --- | --- | --- | --- | --- | --- | --- | --- | --- | --- | --- | --- | --- | --- | --- | --- | --- | --- | --- | --- | --- | --- | --- | --- | --- | --- | --- | --- | --- | --- | --- | --- | --- | --- | --- | --- |
| **1.**Age |  | | **2.**Sex | | Female | | | | | | | | | | | | | | | | | | | | Male | | | | | | | | | | | | |
| **3.**Department | Nephrology | Anesthesiology | | Cardiac surgery | | | | | | | | | | Radiology | | | | | Cardiology | | | | | | | | | | Emergency medicine | | | | | | | | Internal medicine |
| **4.** How many years is your experience in medicine? |  | | | | | | | | | **5.** How many years is your experience in catheter removal/insertion? | | | | | | | | | | | | | | | |  | | | | | | | | | | | |
| **6.** Are you at educator position in catheter insertion/removal? | | | | | | | | | | | | | Yes | | | | | | | | | | | | | | No | | | | | | | | | | |
| **7.** How many jugular and/or subclavian catheters did you insert last week? | | | | | | | | <5 | | | | | | | 5-10 | | | | | | | | 10-15 | | | | | | | | | | | | >15 | | |
| **8.** What is your frequency of jugular and/or subclavian catheter insertion generally? | | | More than once daily | | | | | | | | Once daily | | | | | | | | | Several in a week but not daily | | | | | | | | | | | | Several in a month but not weekly | | | | | |
| **9.** In which position do you insert jugular and/or subclavian catheters? | | | Supine | | | Trandelenburg | | | | | | | | | | Lateral decubitis | | | | | | Sitting | | | | | | | | | One of them | | | | | | |
| **10.** How many jugular and/or subclavian catheters did you remove last week? | | | <5 | | | | | | | | | 5-10 | | | | | | | | | | 10-15 | | | | | | | | | | | >15 | | | | |
| **11.** What is your frequency of jugular and/or subclavian catheter removal generally? | | | More than once daily | | | | | | | | Once daily | | | | | | | | | Several in a week but not daily | | | | | | | | | | | | Several in a month but not weekly | | | | | |
| **12.** In which position do you insert jugular and/or subclavian catheters? | | | Supine | | | | | | Trandelenburg | | | | | | | | | Lateral decubitis | | | | | | | | | | Sitting | | | | | | | | One of them | |
| **13.** Risk of air emboli changes according to the patient’s position | | | | | | | Yes | | | | | | | | | | | | | No | | | | | | | | | | | | | | | | | |
| **14.** Risk of emboli is greater during catheter removal than insertion | | | | | | | Yes | | | | | | | | | | | | | No | | | | | | | | | | | | | | | | | |
| **15.** I use social media | | | | | | | Yes | | | | | | | | | | | | | No | | | | | | | | | | | | | | | | | |
| **16.** I watch educative videos on internet | | | | | | | Yes | | | | | | | | | | | | | No | | | | | | | | | | | | | | | | | |
| **17.** I watch first video when I do a search | | | | | | | Yes | | | | | | | | | | | | | No | | | | | | | | | | | | | | | | | |
| **18.** I prefer intervention videos on human being rather than models | | | | | | | Yes | | | | | | | | | | | | | No | | | | | | | | | | | | | | | | | |
| **19.** My choice will be affected by the body of uploader, e.g. official or individual account | | | | | | | Yes | | | | | | | | | | | | | No | | | | | | | | | | | | | | | | | |
| **20.** Have you watched catheter insertion videos? | | | | | | | Yes  (Continue with 21st question) | | | | | | | | | | | | | No  (Skip to 24th question.) | | | | | | | | | | | | | | | | | |
| **21.** I trust to insertion videos | | | | | | | 0  ( definitely no ) | | | | | | | | | | 1 | | | | 2 | | | 3 | | | | | | 4 | | | | 5  (definitely yes) | | | |
| **22.** I cared position of patient during insertion video | | | | | | | Yes | | | | | | | | | | | | | | No | | | | | | | | | | | | | | | | |
| **23.** I preferred to watch institutional insertion videos | | | | | | | Yes | | | | | | | | | | | | | | No | | | | | | | | | | | | | | | | |
| **24.** Have you watched catheter removal videos? | | | | | | | Yes  (Continue with 25th question) | | | | | | | | | | | | | | No  (Questionnaire ended) | | | | | | | | | | | | | | | | |
| **25.** I trust to removal videos | | | | | | | 0  ( definitely no ) | | | | | | | | | | 1 | | | | 2 | | | 3 | | | | | | 4 | | | | 5  (definitely yes) | | | |
| **26.** I cared position of patient during removal video | | | | | | | Yes | | | | | | | | | | | | | | No | | | | | | | | | | | | | | | | |
| **27.** I cared removal maneuver during video | | | | | | | Yes | | | | | | | | | | | | | | No | | | | | | | | | | | | | | | | |
| **28.** I preferred to watch personally uploaded removal videos | | | | | | | Yes | | | | | | | | | | | | | | No | | | | | | | | | | | | | | | | |
| **Questionnaire ended**  **Thank you for your participation** | | | | | | | | | | | | | | | | | | | | | | | | | | | | | | | | | | | | | |
